# Supplementary material for: Biocompatible ionic liquid [Betaine][H2PO4] as a reusable catalyst for the substitution of xanthen-9-ol under solvent-free conditions
Source: Royal Society of Chemistry journal article supplement (doi:10.1039/d0ra05374k), 2020-01-01

## Supporting information

### **Biocompatible ionic liquid [Betaine][H<sub>2</sub>PO<sub>4</sub>] as reusable catalyst for substitution of xanthen-9-ol under solvent-free condition**

Anlian Zhu,\* Tong Wang, Wanlu Feng, Jianji Wang, Lingjun Li\*

School of Chemistry and Chemical Engineering, Key Laboratory of Green Chemical Media and Reactions, Ministry of Education, Collaborative Innovation Center of Henan Province for Green Manufacturing of Fine Chemicals, Henan Normal University, Xinxiang, Henan 453007, P. R. China

alzhuchem@126.com; lingjunlee@htu.cn

#### **1. General information**

All of the reagents were purchased with AR grade and used without further purifications. <sup>1</sup>H-NMR and <sup>13</sup>C-NMR spectra were recorded on Bruker AV-400 and AV-600 instrument using D<sub>2</sub>O or CDCl<sub>3</sub> as solvent. Fourier Transform Infrared (FT-IR) spectra were measured using from KBr pellets using Perkin Elmer 400 FTIR spectrometer over the 4000-400 cm<sup>-1</sup> range at the resolution of 1 cm<sup>-1</sup>. Melting Points were detected using melting point measurer (Sichuan University instrument factory) without correction.

#### **2. Selected spectra data for the utilized ionic liquids and substitution products**

[Betaine][H<sub>2</sub>PO<sub>4</sub>]

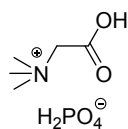

<sup>1</sup>H NMR (400 MHz, D<sub>2</sub>O) δ 4.03 (s, 2H), 3.25 (s, 9H) ppm; <sup>13</sup>C NMR (100 MHz, D<sub>2</sub>O) δ 168.1, 64.8, 53.5 ppm.

[DMEA][H<sub>2</sub>PO<sub>4</sub>]

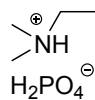

$^1\text{H}$  NMR (400 MHz,  $\text{D}_2\text{O}$ )  $\delta$  3.01 (q,  $J = 7.2$  Hz, 2H), 2.69 (s, 6H), 1.14 (t,  $J = 7.2$  Hz, 3H) ppm;  $^{13}\text{C}$  NMR (100 MHz,  $\text{D}_2\text{O}$ )  $\delta$  52.8, 41.9, 8.9 ppm.

[DMEOA][ $\text{H}_2\text{PO}_4$ ]

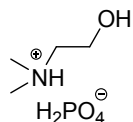

$^1\text{H}$  NMR (400 MHz,  $\text{D}_2\text{O}$ )  $\delta$  3.67 - 3.65 (m, 2H), 3.06 - 3.03 (m, 2H), 2.68 (s, 6H) ppm;  $^{13}\text{C}$  NMR (100 MHz,  $\text{D}_2\text{O}$ )  $\delta$  58.5, 55.1, 42.6 ppm.

[Betaine][ $\text{HSO}_4$ ]

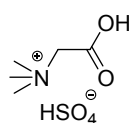

$^1\text{H}$  NMR (400 MHz,  $\text{D}_2\text{O}$ )  $\delta$  4.19 (s, 2H), 3.25 (s, 9H) ppm;  $^{13}\text{C}$  NMR (100 MHz,  $\text{D}_2\text{O}$ )  $\delta$  166.9, 63.4, 53.8 ppm.

[Betaine][Pro]

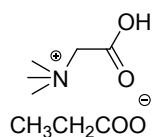

$^1\text{H}$  NMR (400 MHz,  $\text{D}_2\text{O}$ )  $\delta$  3.82 (s, 2H), 3.18 (s, 9H), 2.30 (q,  $J = 7.5$  Hz, 2H), 1.00 (t,  $J = 7.6$  Hz, 3H) ppm;  $^{13}\text{C}$  NMR (100 MHz,  $\text{D}_2\text{O}$ )  $\delta$  179.6, 168.8, 66.1, 53.3, 27.3, 8.5 ppm.

[Betaine][Lac]

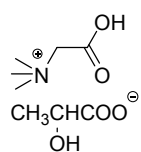

$^1\text{H}$  NMR (400 MHz,  $\text{D}_2\text{O}$ )  $\delta$  4.23 (q,  $J = 7.0$  Hz, 1H), 3.82 (s, 2H), 3.15 (s, 9H), 1.28 (d,  $J = 7.0$  Hz, 3H) ppm;  $^{13}\text{C}$  NMR (100 MHz,  $\text{D}_2\text{O}$ )  $\delta$  178.7, 168.6, 66.5, 65.7, 53.3, 19.4 ppm.

[Betaine][Ac]

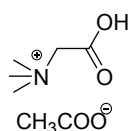

$^1\text{H}$  NMR (400 MHz,  $\text{D}_2\text{O}$ )  $\delta$  3.82 (s, 2H), 3.18 (s, 9H), 2.00 (s, 3H) ppm;  $^{13}\text{C}$  NMR (100 MHz,  $\text{D}_2\text{O}$ )  $\delta$  176.7, 169.0, 66.1, 53.3, 20.5 ppm.

[DEA][ $\text{H}_2\text{PO}_4$ ]

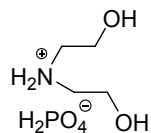

$^1\text{H}$  NMR (400 MHz,  $\text{D}_2\text{O}$ )  $\delta$  3.53 - 3.33 (m, 4H), 2.89 - 2.69 (m, 4H) ppm;  $^{13}\text{C}$  NMR (100 MHz,  $\text{D}_2\text{O}$ )  $\delta$  56.2, 48.5 ppm.

[TEOA][ $\text{H}_2\text{PO}_4$ ]

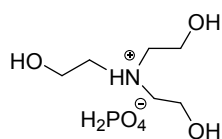

$^1\text{H}$  NMR (400 MHz,  $\text{D}_2\text{O}$ )  $\delta$  3.91 (t,  $J = 4.0$  Hz, 6H), 3.44 (t,  $J = 4.0$  Hz, 6H) ppm;  $^{13}\text{C}$  NMR (100 MHz,  $\text{D}_2\text{O}$ )  $\delta$  55.2, 54.9 ppm.

[Choline][ $\text{H}_2\text{PO}_4$ ]

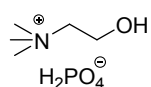

$^1\text{H}$  NMR (400 MHz,  $\text{D}_2\text{O}$ )  $\delta$  4.00 - 3.96 (m, 2H), 3.45 - 3.43 (m, 2H), 3.12 (s, 9H) ppm;  $^{13}\text{C}$  NMR (100 MHz,  $\text{D}_2\text{O}$ )  $\delta$  67.3, 55.5, 53.8 ppm.

[DEEOA][ $\text{H}_2\text{PO}_4$ ]

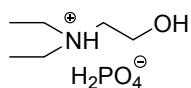

$^1\text{H}$  NMR (400 MHz,  $\text{D}_2\text{O}$ )  $\delta$  3.88 - 3.85 (m, 2H), 3.28 - 3.20 (m, 6H), 1.27 (t,  $J = 4.0$  Hz, 6H) ppm;  $^{13}\text{C}$  NMR (150 MHz,  $\text{D}_2\text{O}$ )  $\delta$  55.2, 53.1, 47.5, 7.9 ppm.

3-(9H-Xanthen-9-yl)-1H-indole

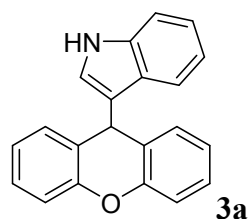

$^1\text{H}$  NMR (400 MHz,  $\text{CDCl}_3$ )  $\delta$  8.02 (s, 1H), 7.35 (t,  $J = 7.6$  Hz, 2H), 7.21 - 6.88 (m, 11H), 5.55 (s, 1H) ppm;  $^{13}\text{C}$  NMR (150 MHz,  $\text{CDCl}_3$ )  $\delta$  151.4, 136.8, 129.5, 127.7, 125.9, 124.5, 123.1, 122.8, 122.2, 120.5, 119.7, 119.7, 116.3, 111.2, 35.5 ppm.

1-Methyl-3-(9H-xanthen-9-yl)-1H-indole

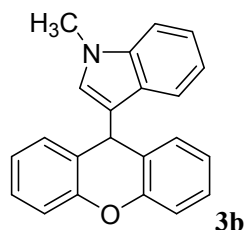

$^1\text{H}$  NMR (400 MHz,  $\text{CDCl}_3$ )  $\delta$  7.41 (d, 1H), 7.28 - 6.87 (m, 12H), 5.53 (s, 1H), 3.74 (s, 3H) ppm;  $^{13}\text{C}$  NMR (150 MHz,  $\text{CDCl}_3$ )  $\delta$  151.3, 137.4, 129.5, 129.5, 127.6, 127.6, 127.5, 126.4, 124.8, 123.1, 123.1, 121.7, 119.7, 119.2, 119.1, 116.3, 109.3, 35.4, 32.7 ppm.

2-Methyl-3-(9H-xanthen-9-yl)-1H-indole

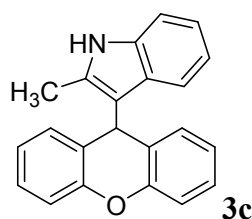

$^1\text{H}$  NMR (400 MHz,  $\text{CDCl}_3$ )  $\delta$  7.83 (s, 1H), 7.28 - 6.80 (m, 12H), 5.61 (s, 1H), 2.37 (s, 3H) ppm;  $^{13}\text{C}$  NMR (150 MHz,  $\text{CDCl}_3$ )  $\delta$  151.3, 135.4, 132.3, 129.4, 127.6, 124.1, 123.1, 121.2, 119.5, 118.9, 116.2, 115.3, 110.3, 33.7, 12.0 ppm.

4-Methyl-3-(9H-xanthen-9-yl)-1H-indole

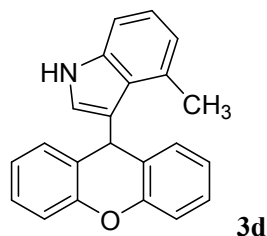

$^1\text{H}$  NMR (600 MHz,  $\text{CDCl}_3$ )  $\delta$  8.16 (s, 1H), 7.24 - 6.67 (m, 12H), 5.74 (s, 1H), 2.01 (s, 3H) ppm;  $^{13}\text{C}$  NMR (150 MHz,  $\text{CDCl}_3$ )  $\delta$  150.9, 131.1, 129.2, 127.7, 126.2, 125.6, 123.1, 122.4, 121.7, 116.2, 109.1, 36.1, 29.8, 21.3 ppm.

5-Chloro-3-(9H-xanthen-9-yl)-1H-indole

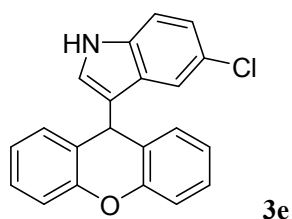

$^1\text{H}$  NMR (600 MHz,  $\text{CDCl}_3$ )  $\delta$  8.06 (s, 1H), 7.32 - 6.89 (m, 12H), 5.51 (s, 1H) ppm;  
 $^{13}\text{C}$  NMR (150 MHz,  $\text{CDCl}_3$ )  $\delta$  151.3, 135.1, 129.3, 127.9, 126.9, 125.4, 124.3, 124.1, 123.2, 122.6, 120.2, 119.1, 116.5, 112.3, 35.4 ppm.

5-Bromo-3-(9H-xanthen-9-yl)-1H-indole

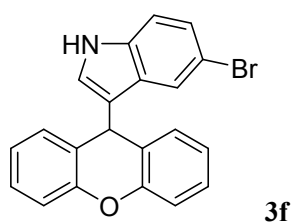

$^1\text{H}$  NMR (600 MHz,  $\text{CDCl}_3$ )  $\delta$  8.05 (s, 1H), 7.50 (s, 1H), 7.25 - 6.95 (m, 12H), 5.51 (s, 1H) ppm;  $^{13}\text{C}$  NMR (150 MHz,  $\text{CDCl}_3$ )  $\delta$  151.3, 135.3, 129.2, 127.9, 127.6, 125.2, 124.1, 123.2, 122.1, 120.2, 116.5, 113.0, 112.7, 35.4 ppm.

6-Chloro-3-(9H-xanthen-9-yl)-1H-indole

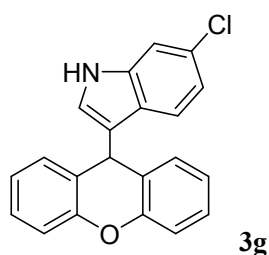

$^1\text{H}$  NMR (600 MHz,  $\text{CDCl}_3$ )  $\delta$  7.99 (s, 1H), 7.32 (d, 1H), 7.24 - 7.05 (m, 8H), 6.96 - 6.89 (m, 3H), 5.51 (s, 1H) ppm;  $^{13}\text{C}$  NMR (150 MHz,  $\text{CDCl}_3$ )  $\delta$  151.3, 137.2, 129.3, 128.2, 127.9, 124.4, 124.0, 123.3, 123.2, 120.6, 120.5, 120.5, 116.4, 111.2, 35.5 ppm.

6-Bromo-3-(9H-xanthen-9-yl)-1H-indole

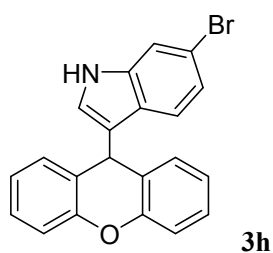

$^1\text{H}$  NMR (600 MHz,  $\text{CDCl}_3$ )  $\delta$  7.98 (s, 1H), 7.47 (s, 1H), 7.18 (m, 5H), 7.12 - 7.02 (m, 4H), 6.93 (m, 2H), 5.51 (s, 1H) ppm;  $^{13}\text{C}$  NMR (150 MHz,  $\text{CDCl}_3$ )  $\delta$  151.3, 137.6, 129.3, 127.9, 124.7, 123.9, 123.3, 123.2, 123.0, 120.9, 120.5, 116.4, 115.9, 114.12, 35.5 ppm.

4-Methoxy-3-(9H-xanthen-9-yl)-1H-indole

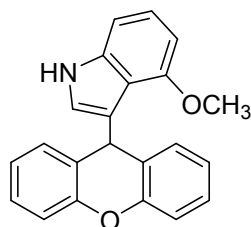

**3i**

$^1\text{H}$  NMR (600 MHz,  $\text{CDCl}_3$ )  $\delta$  7.92 (s, 1H), 7.25 - 7.05 (m, 7H), 6.96 - 6.89 (m, 3H), 6.73 (s, 1H), 6.49 (d,  $J = 7.8$  Hz, 1H), 5.99 (s, 1H), 3.83 (s, 3H) ppm;  $^{13}\text{C}$  NMR (150 MHz,  $\text{CDCl}_3$ )  $\delta$  154.6, 151.0, 137.9, 129.8, 127.1, 126.2, 122.9, 122.8, 122.1, 116.4, 116.0, 104.4, 99.9, 54.8, 35.3 ppm.

7-Methyl-3-(9H-xanthen-9-yl)-1H-indole

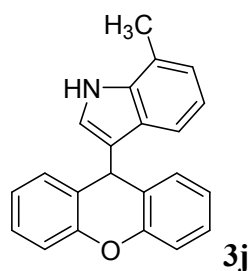

**3j**

$^1\text{H}$  NMR (600 MHz,  $\text{CDCl}_3$ )  $\delta$  7.92 (s, 1H), 7.25 - 6.89 (m, 12H), 5.56 (s, 1H), 2.46 (s, 3H) ppm;  $^{13}\text{C}$  NMR (150 MHz,  $\text{CDCl}_3$ )  $\delta$  151.3, 136.3, 129.5, 127.7, 125.4, 124.5, 123.1, 122.7, 122.5, 121.0, 120.3, 119.9, 117.5, 116.3, 35.6, 16.6 ppm.

5-Methoxy-3-(9H-xanthen-9-yl)-1H-indole

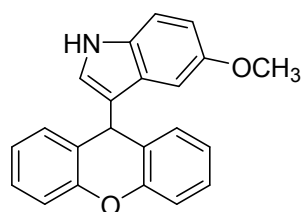

**3l**

$^1\text{H}$  NMR (600 MHz,  $\text{CDCl}_3$ )  $\delta$  7.89 (s, 1H), 7.24 - 6.76 (m, 12H), 5.52 (s, 1H), 3.69 (s, 3H) ppm;  $^{13}\text{C}$  NMR (150 MHz,  $\text{CDCl}_3$ )  $\delta$  153.9, 151.4, 131.9, 129.5, 127.7, 126.4, 124.4, 123.3, 123.1, 120.4, 116.3, 112.2, 111.8, 101.5, 55.7, 35.6 ppm.

2-(9H-xanthen-9-yl)-1H-pyrrole

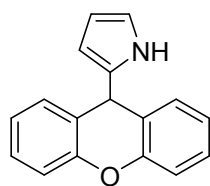

**3m**

$^1\text{H}$  NMR (600 MHz,  $\text{CDCl}_3$ )  $\delta$  7.68 (s, 1H), 7.23 (dd,  $J = 14.4, 6.6$  Hz, 3H), 7.13 (dd,  $J = 22.8, 7.8$  Hz, 4H), 7.02 (t,  $J = 7.2$  Hz, 2H), 6.62 (s, 1H), 6.19 - 6.09 (m, 2H), 5.36 (s, 1H) ppm;  $^{13}\text{C}$  NMR (150 MHz,  $\text{CDCl}_3$ )  $\delta$  151.3, 134.2, 129.4, 128.2, 123.4, 122.9, 118.1, 116.7, 108.0, 107.3, 37.3 ppm.

3-(9H-xanthen-9-yl)pentane-2,4-dione

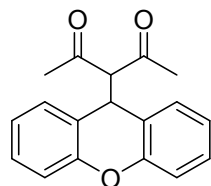

**3n**

$^1\text{H}$  NMR (400 MHz,  $\text{CDCl}_3$ ):  $\delta$  1.87 (s, 6H), 4.08 - 4.11 (d, 1H, CH), 4.83 - 4.86 (d, 1H, CH), 7.02 - 7.27 (m, 8H) ppm;  $^{13}\text{C}$  NMR (150 MHz,  $\text{CDCl}_3$ ):  $\delta$  201.7, 153.3, 129.1, 128.4, 123.7, 123.4, 116.8, 73.8, 40.2, 31.8 ppm.

2-(9H-xanthen-9-yl)malononitrile

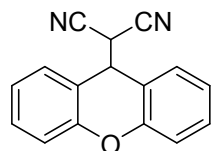

**3o**

$^1\text{H}$  NMR (600 MHz,  $\text{CDCl}_3$ )  $\delta$  7.46 (d,  $J = 7.8$  Hz, 2H), 7.42 (t,  $J = 7.8$  Hz, 2H), 7.26 - 7.19 (m, 4H), 4.67 (d,  $J = 6.0$  Hz, 1H), 3.84 (d,  $J = 6.0$  Hz, 1H) ppm;  $^{13}\text{C}$  NMR (150 MHz,  $\text{CDCl}_3$ )  $\delta$  152.6, 130.5, 129.1, 124.3, 117.5, 117.3, 111.3, 41.6, 32.9 ppm.

2-(9H-xanthen-9-ylthio)pyridine

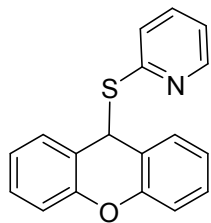

**3p**

$^1\text{H}$  NMR (400 MHz,  $\text{CDCl}_3$ )  $\delta$  8.58 (d,  $J = 4.5$  Hz, 1H), 7.50 - 7.47 (m, 3H), 7.24 - 7.21 (m, 2H), 7.11 - 7.01 (m, 6H), 6.78 (s, 1H) ppm;  $^{13}\text{C}$  NMR (100 MHz,  $\text{CDCl}_3$ )  $\delta$  157.8, 152.2, 149.3, 136.4, 129.4, 128.7, 123.4, 123.3, 122.3, 120.6, 116.6, 41.3 ppm.

1-Methyl-2-(9H-xanthen-9-ylsulfanyl)-1H-imidazole

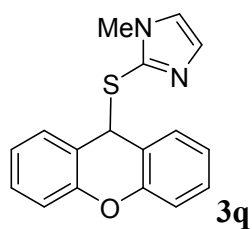

$^1\text{H}$  NMR (400 MHz,  $\text{CDCl}_3$ )  $\delta$  7.63 (s, 1H), 7.48 (d,  $J = 7.7$  Hz, 2H), 7.33 (t,  $J = 7.7$  Hz, 2H), 7.18 (d,  $J = 8.3$  Hz, 2H), 7.08 (t,  $J = 7.5$  Hz, 2H), 6.53 (d,  $J = 2.2$  Hz, 1H), 6.28 (d,  $J = 2.2$  Hz, 1H), 3.66 (s, 3H) ppm;  $^{13}\text{C}$  NMR (100 MHz,  $\text{CDCl}_3$ )  $\delta$  162.9, 151.2, 129.9, 129.8, 123.9, 119.3, 118.8, 116.8, 114.9, 51.6, 35.1 ppm.

9-Azido-9H-xanthene

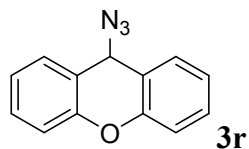

$^1\text{H}$  NMR (400 MHz,  $\text{CDCl}_3$ )  $\delta$  7.51 - 7.37 (m, 4H), 7.23 - 7.19 (m, 4H), 5.58 (s, 1H) ppm;  $^{13}\text{C}$  NMR (100 MHz,  $\text{CDCl}_3$ )  $\delta$  133.3, 131.4, 129.1, 128.5, 127.0, 126.7, 65.2 ppm.



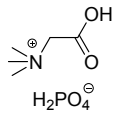

[Betaine][H<sub>2</sub>PO<sub>4</sub>]

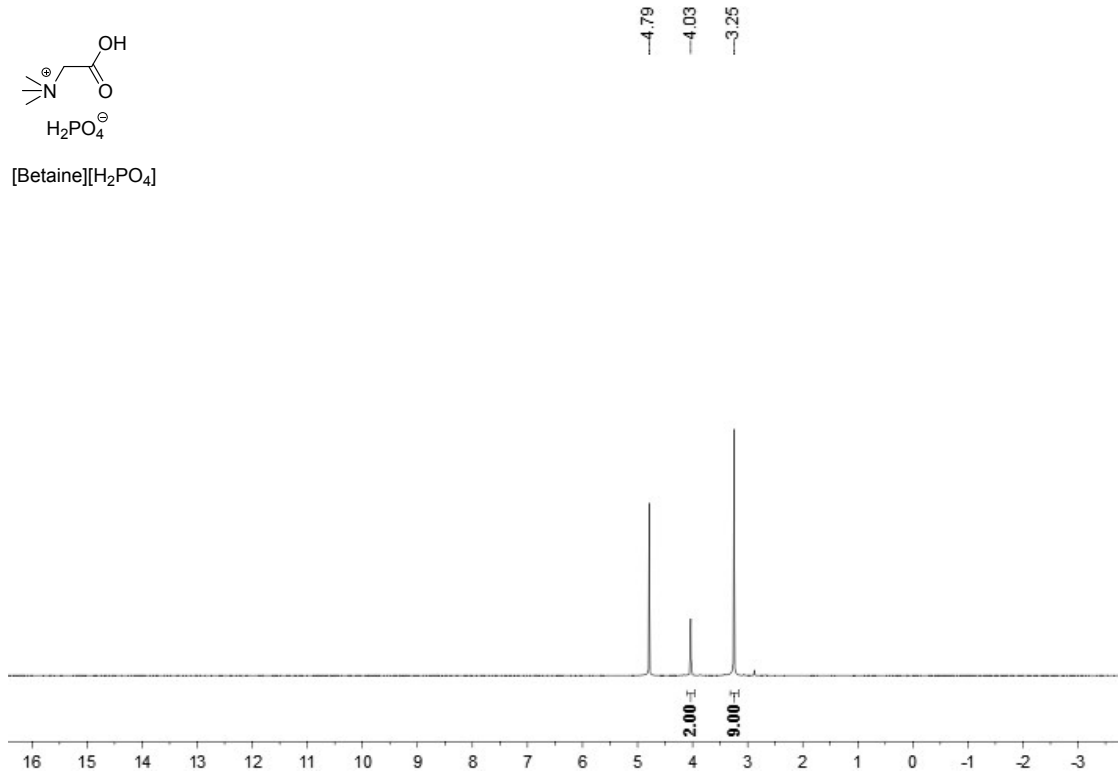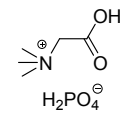

[Betaine][H<sub>2</sub>PO<sub>4</sub>]

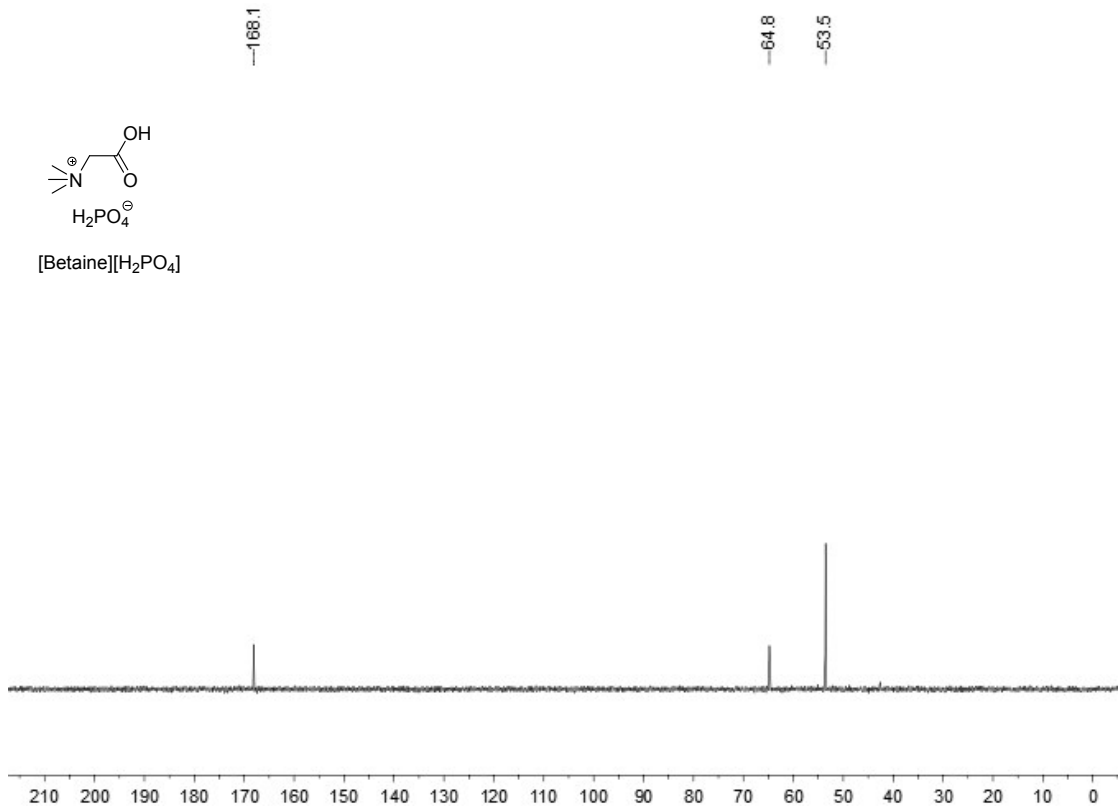

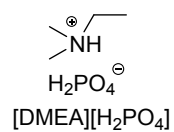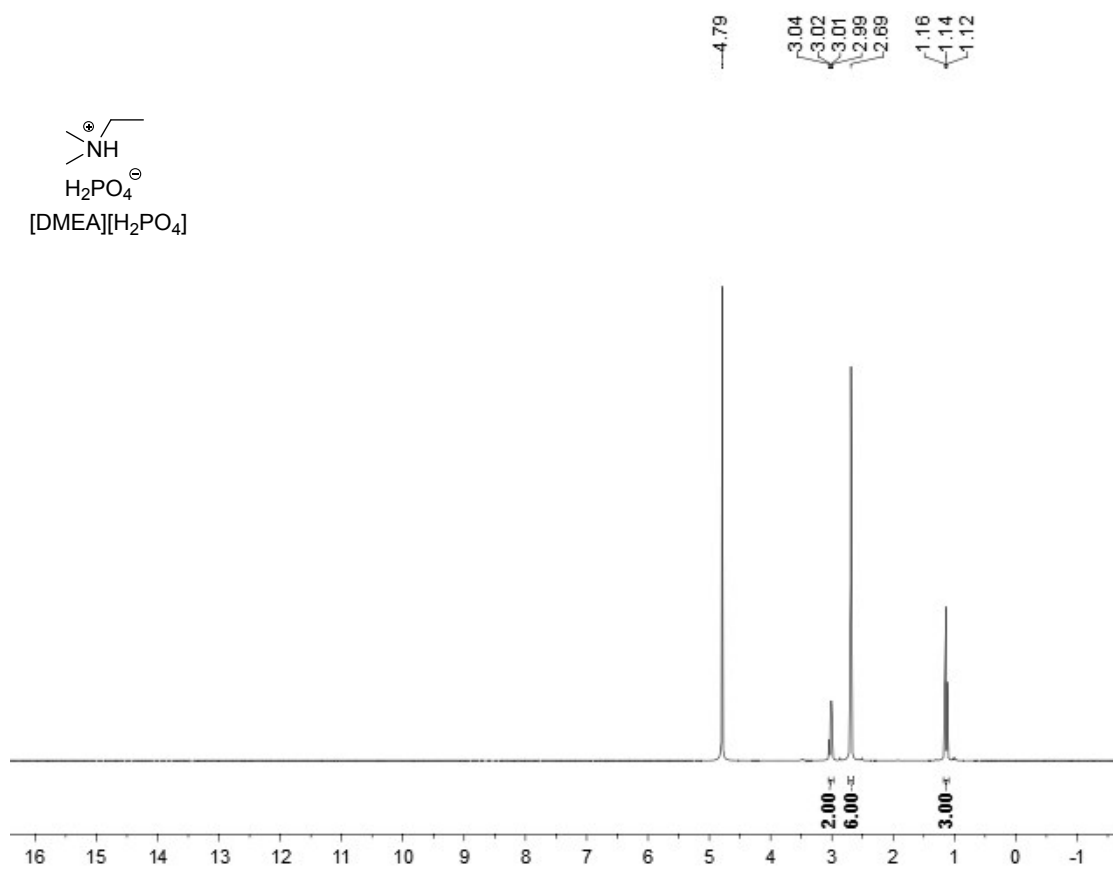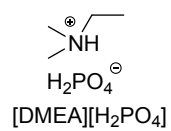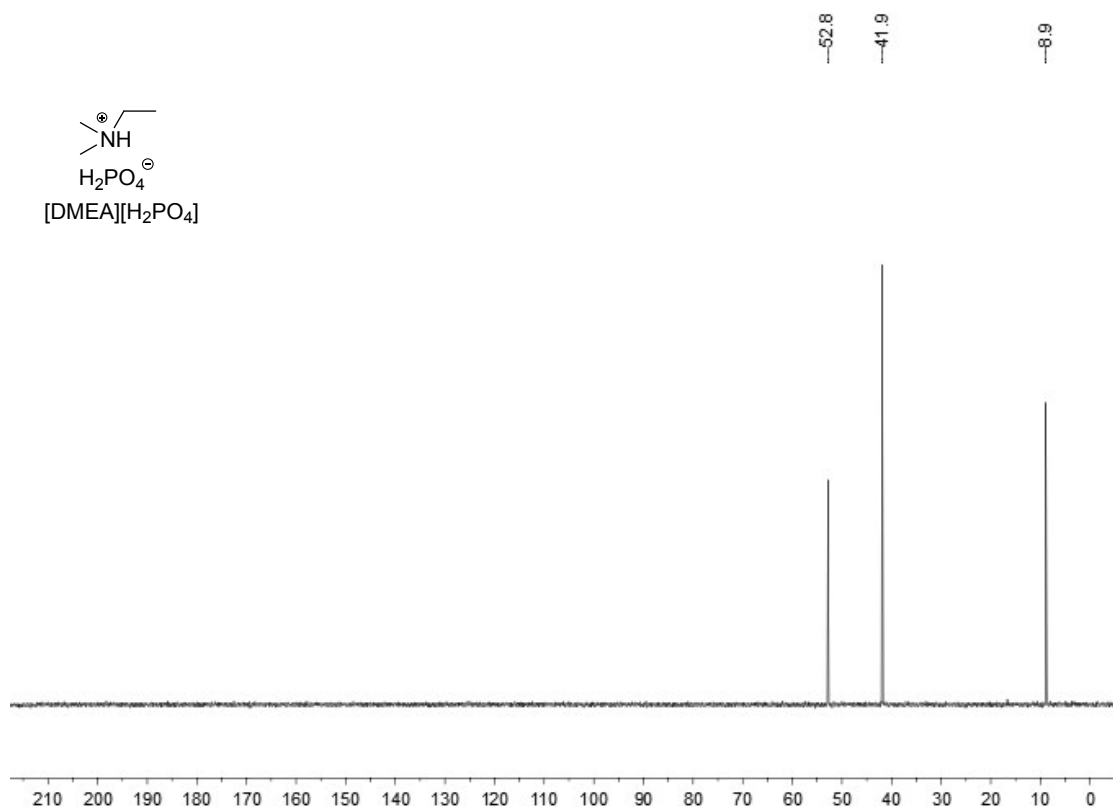

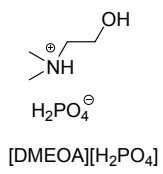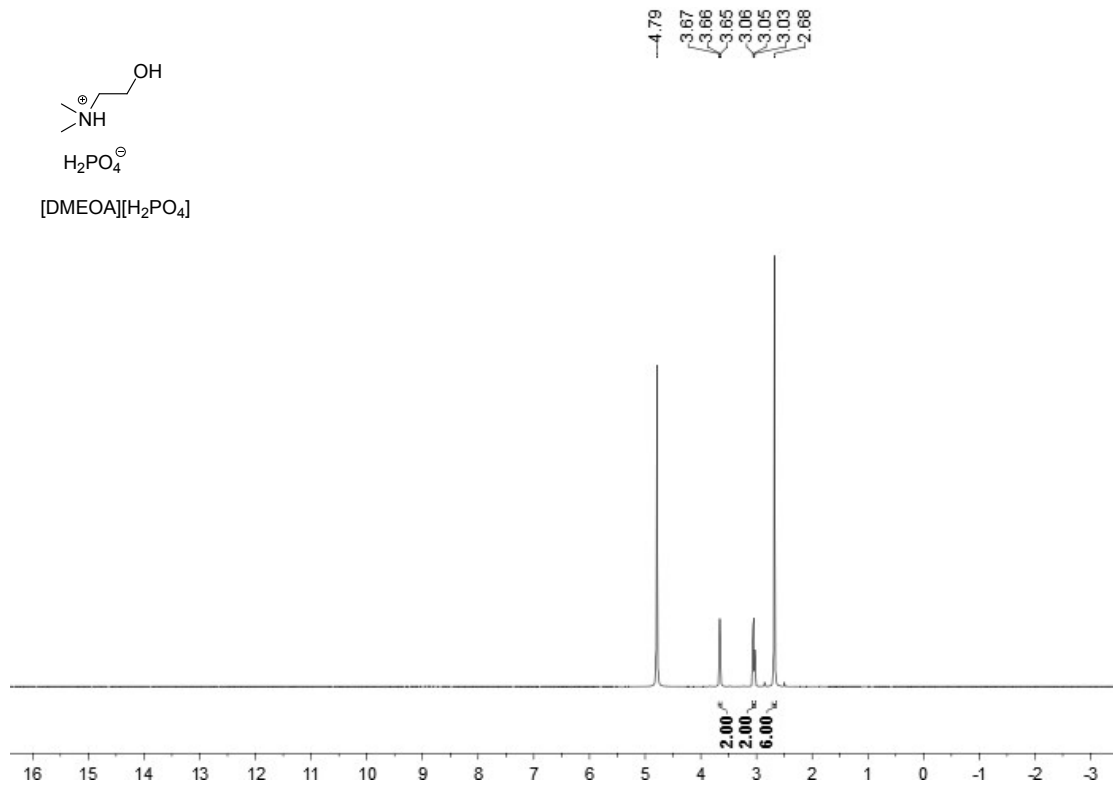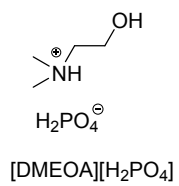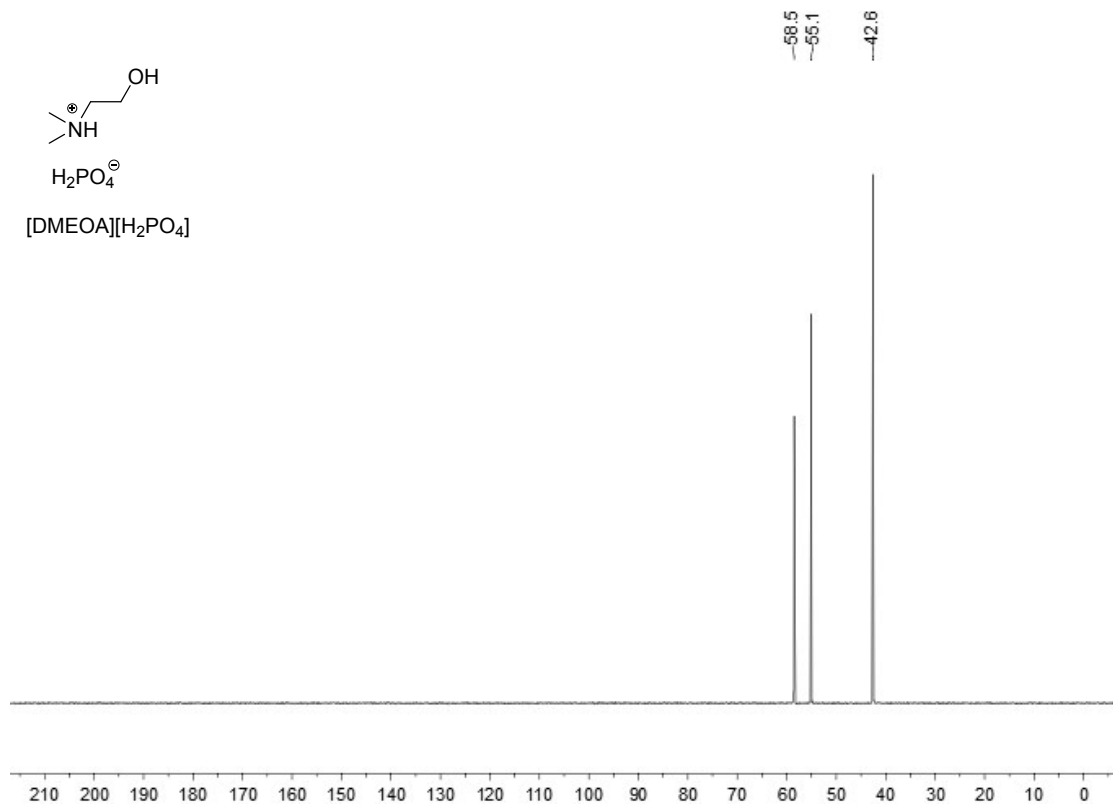

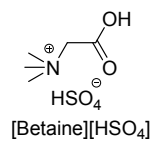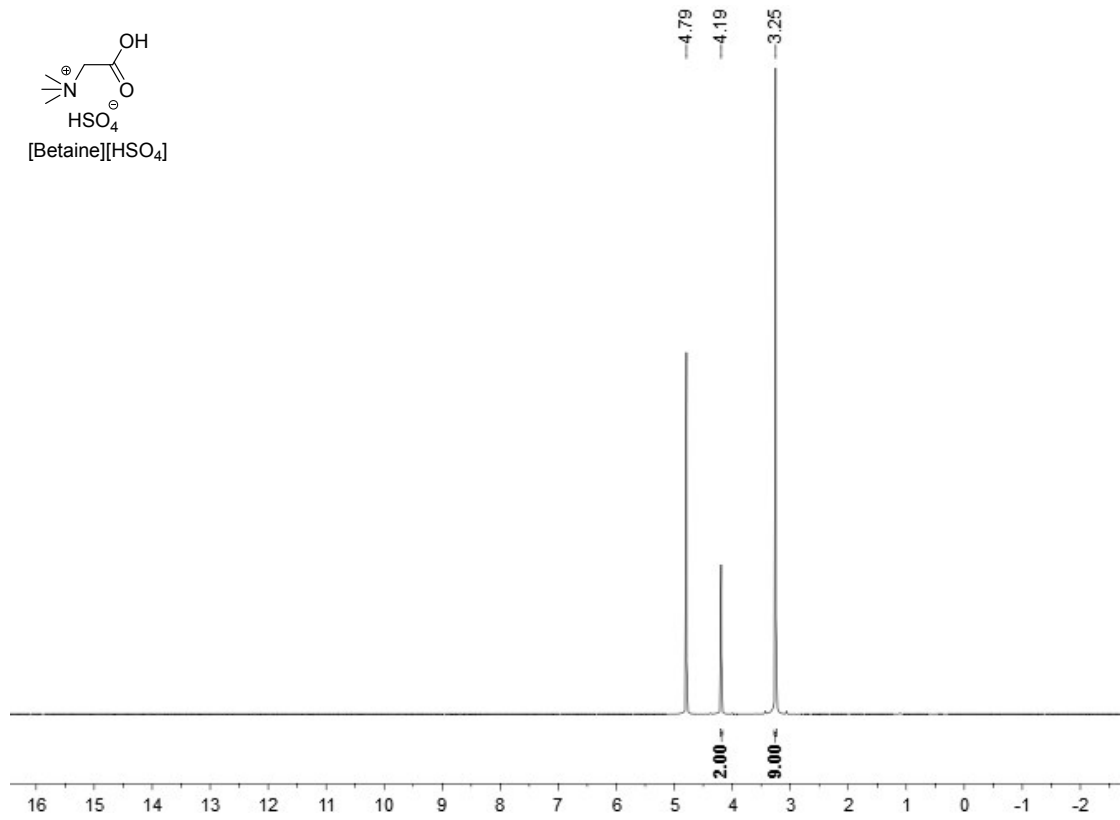

-166.9

-63.4

-53.8

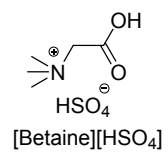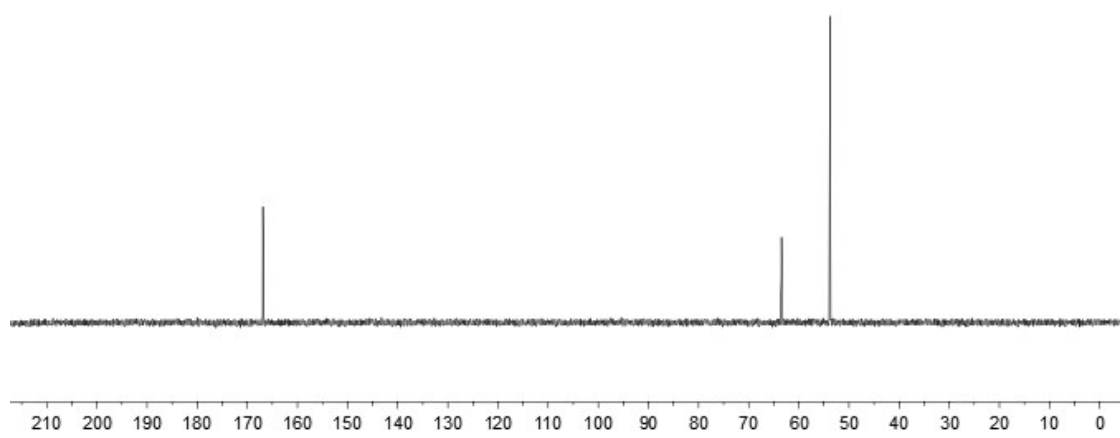

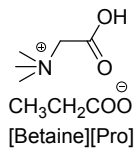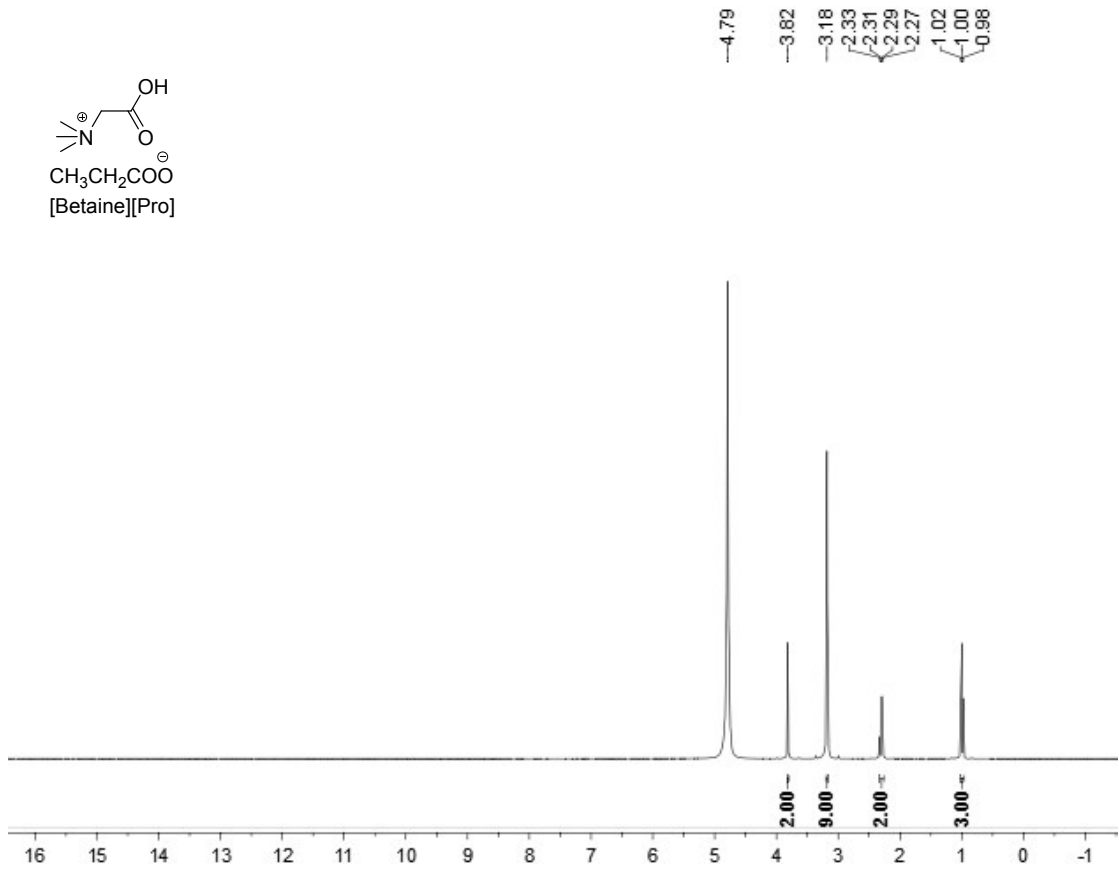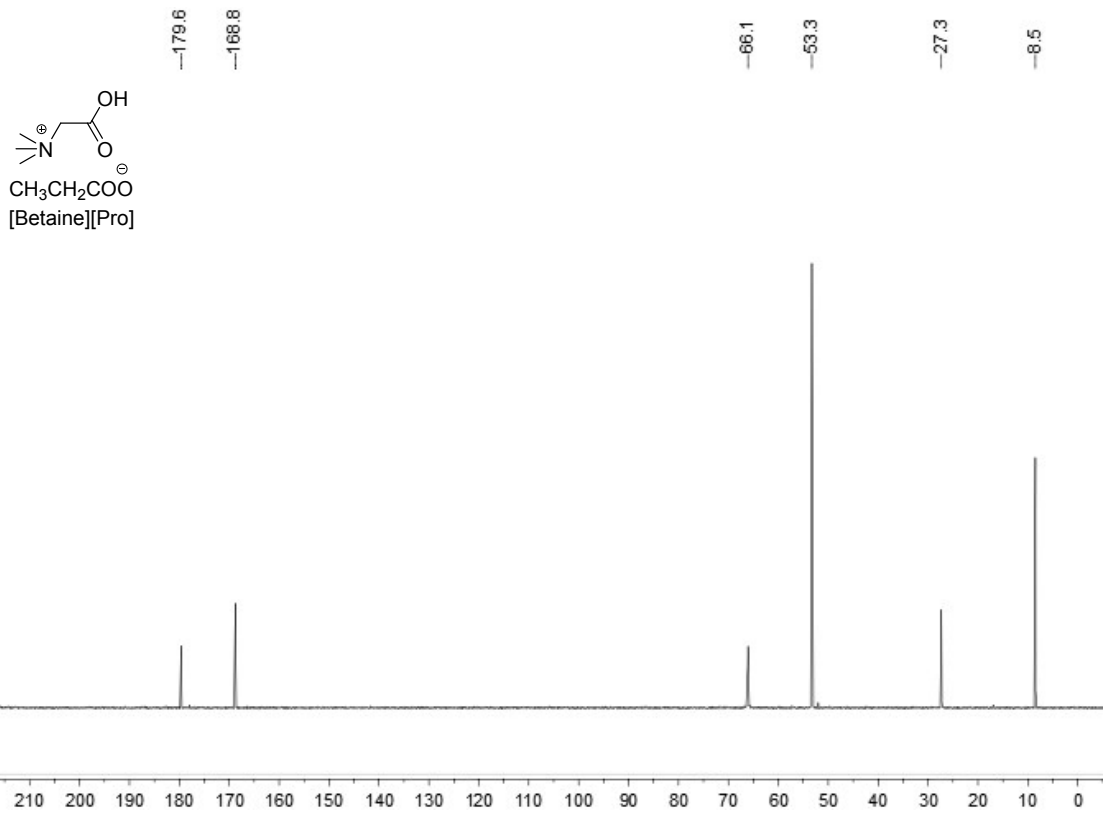

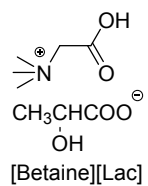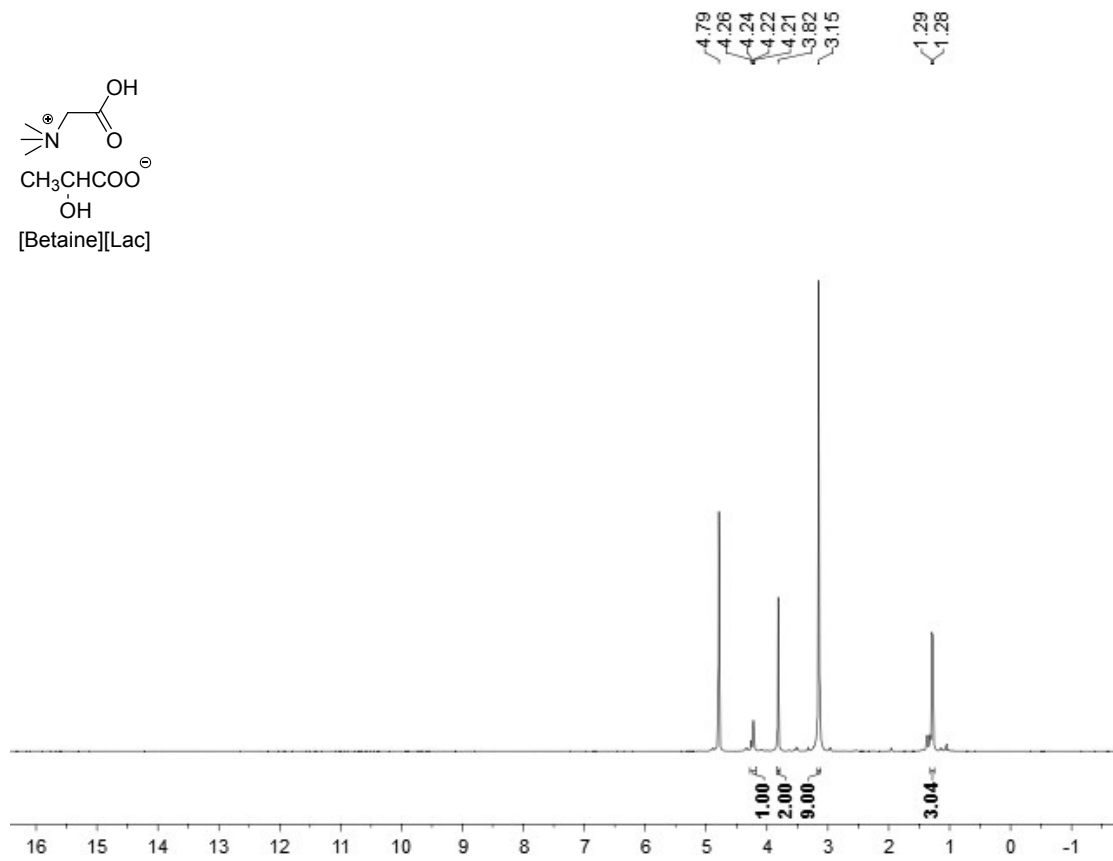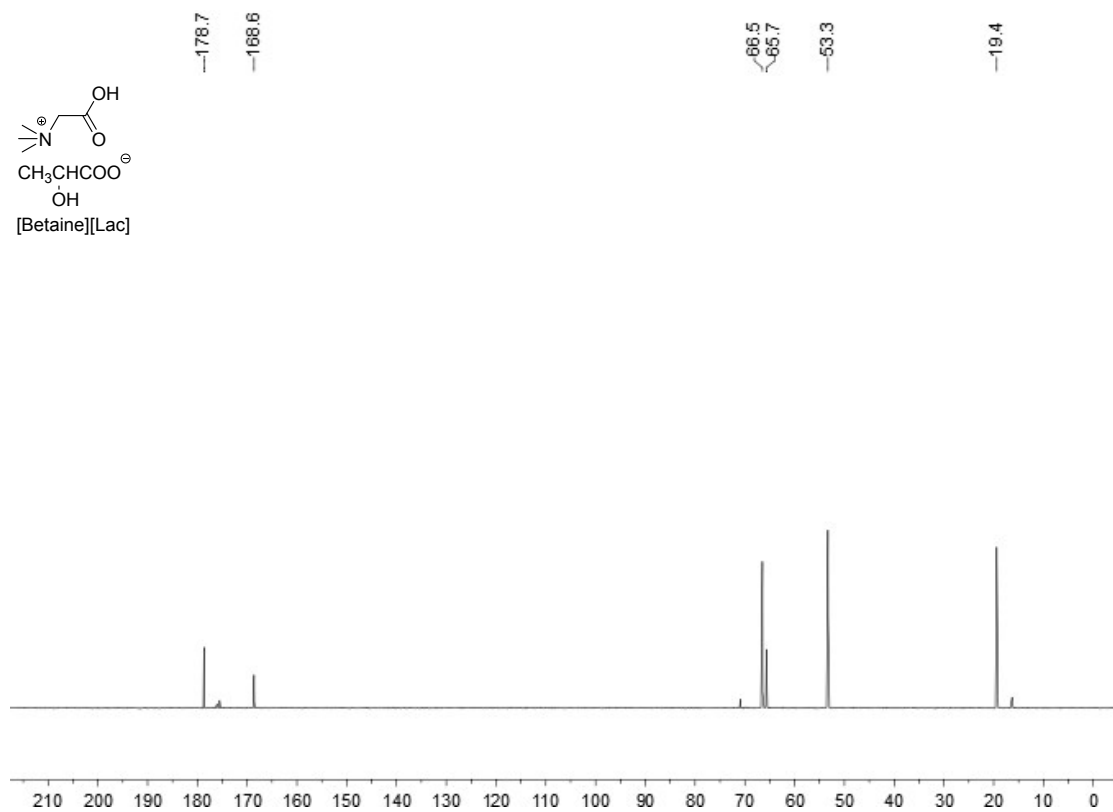

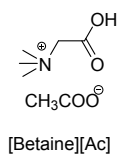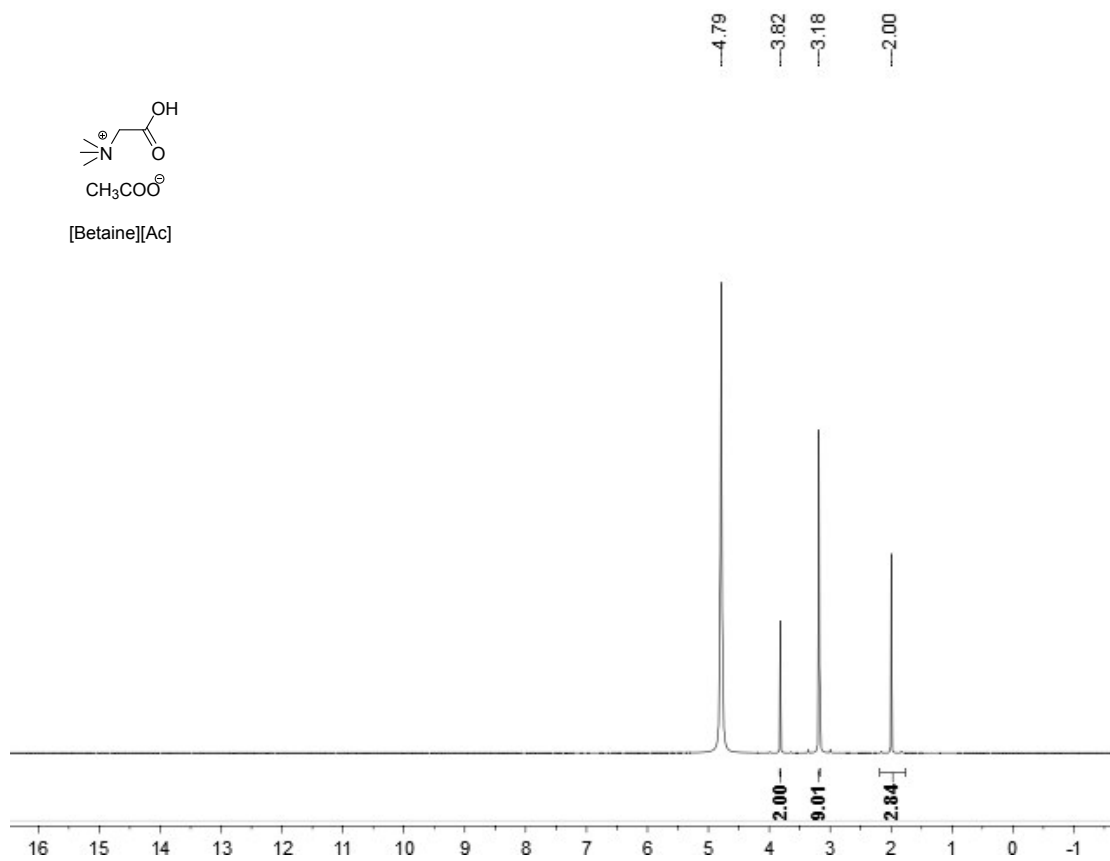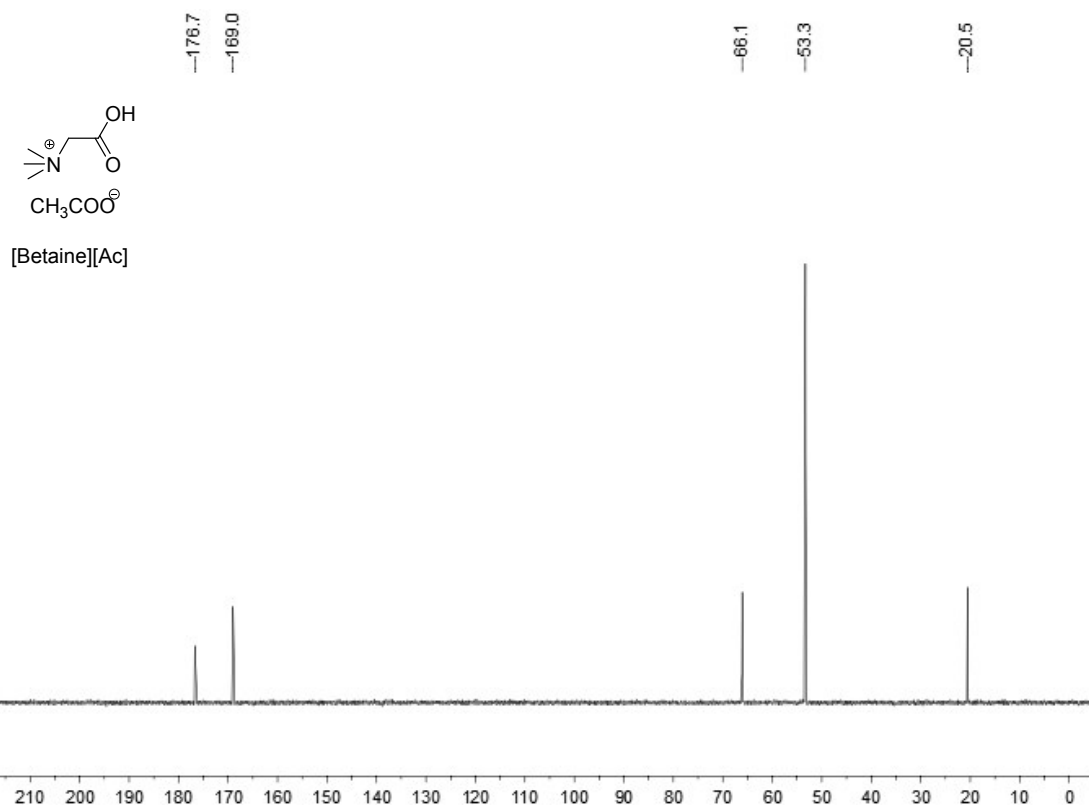

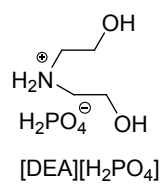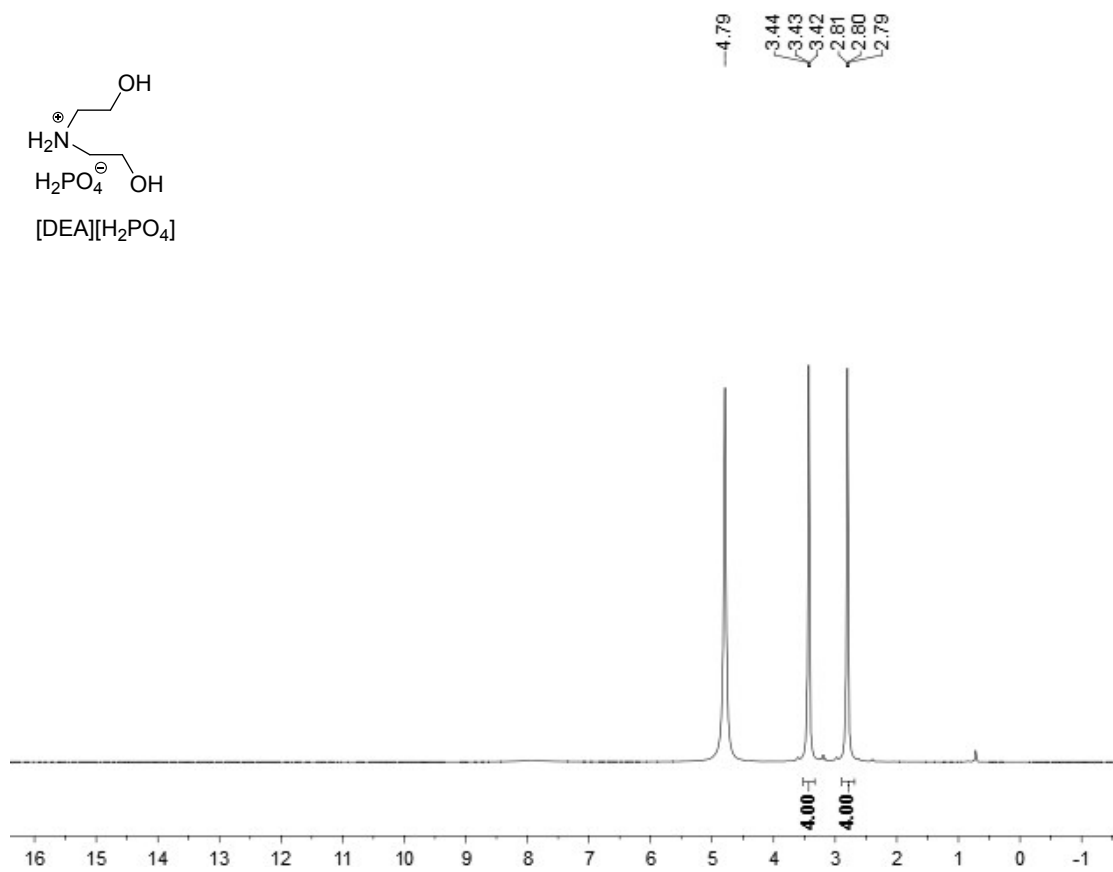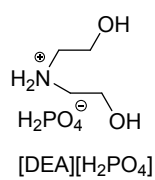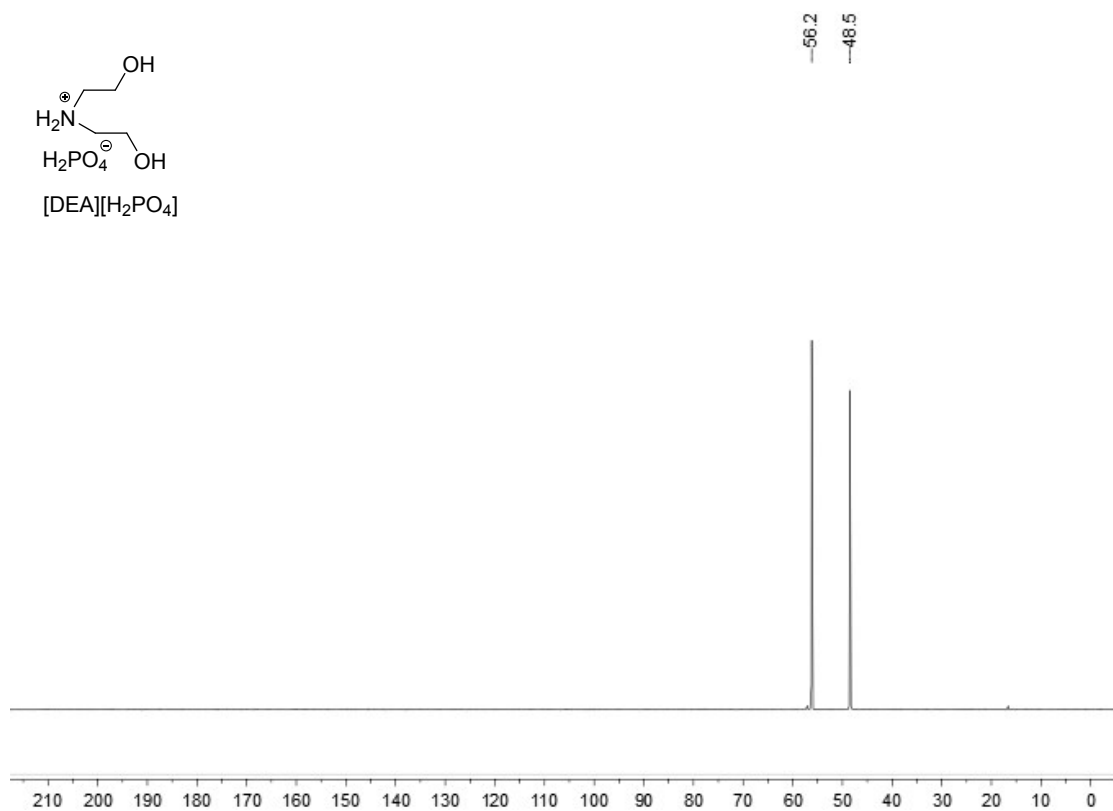



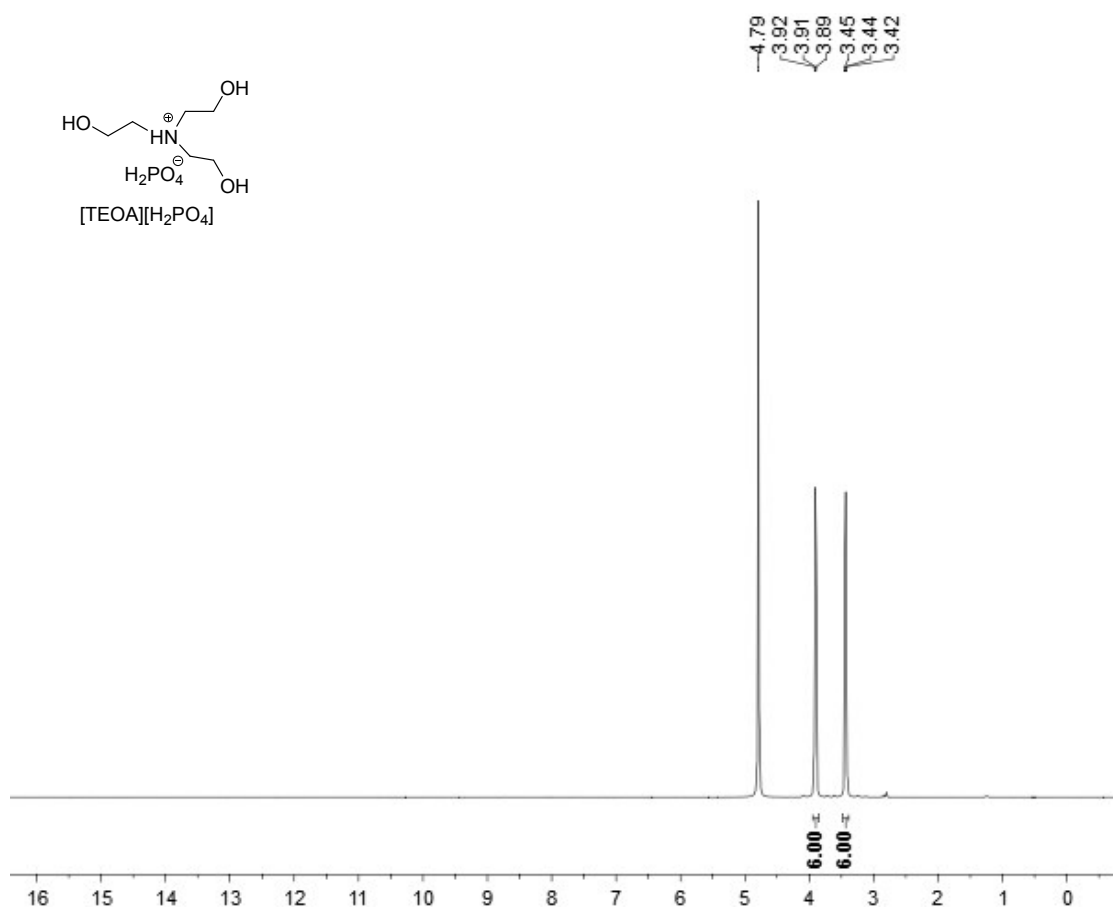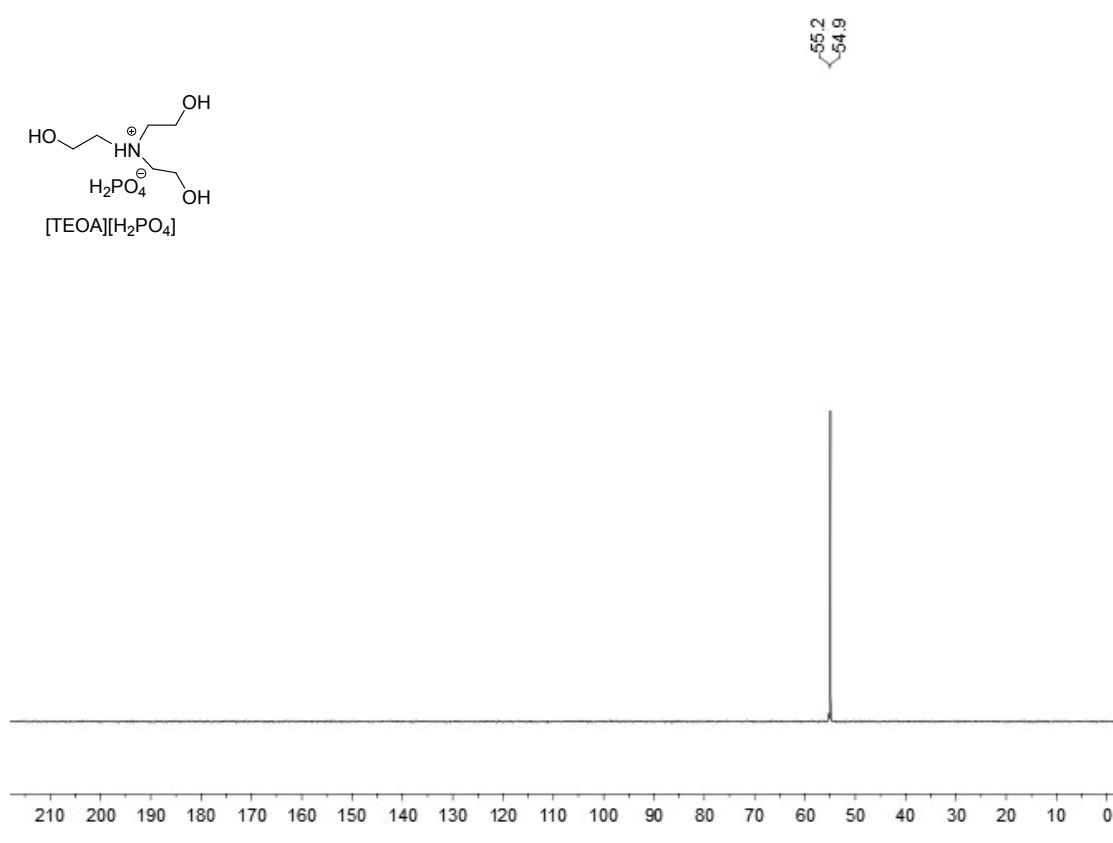

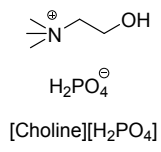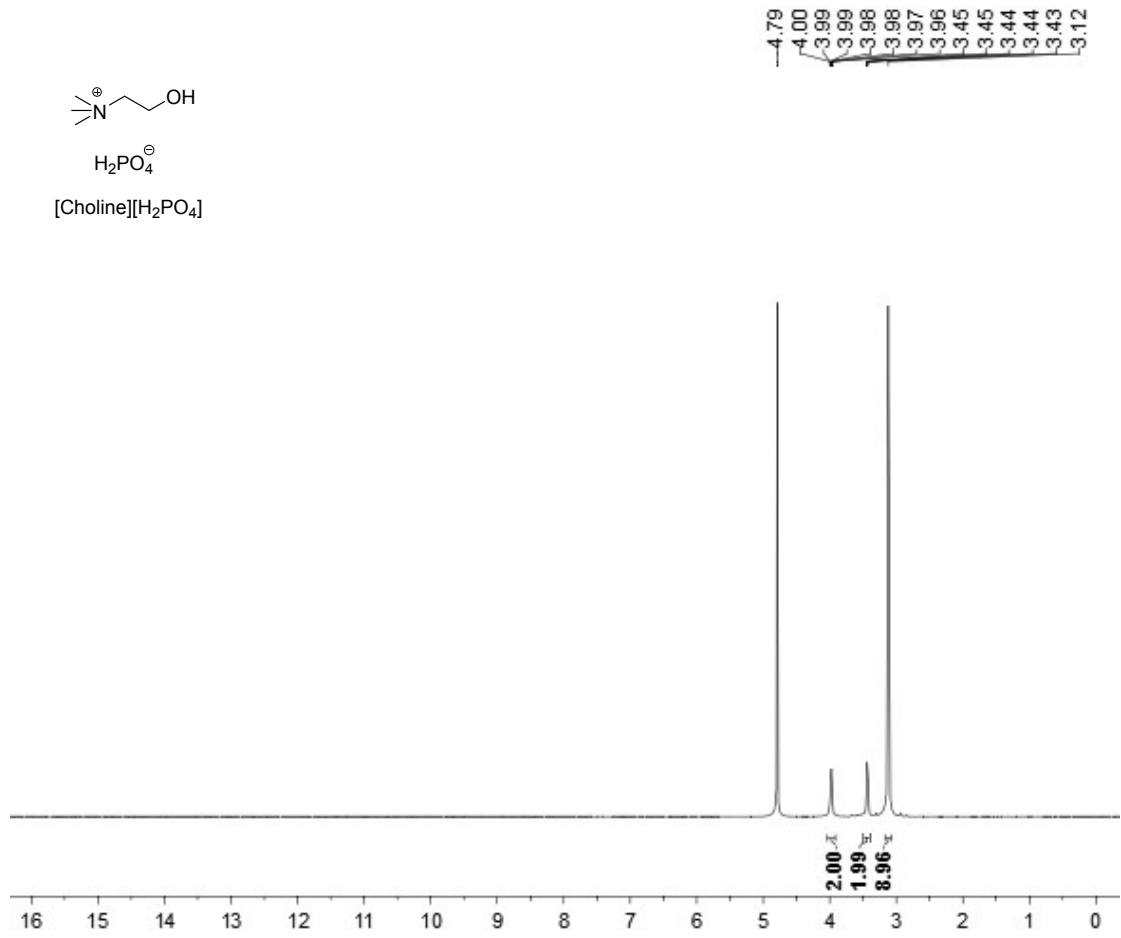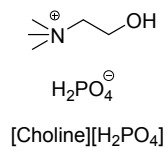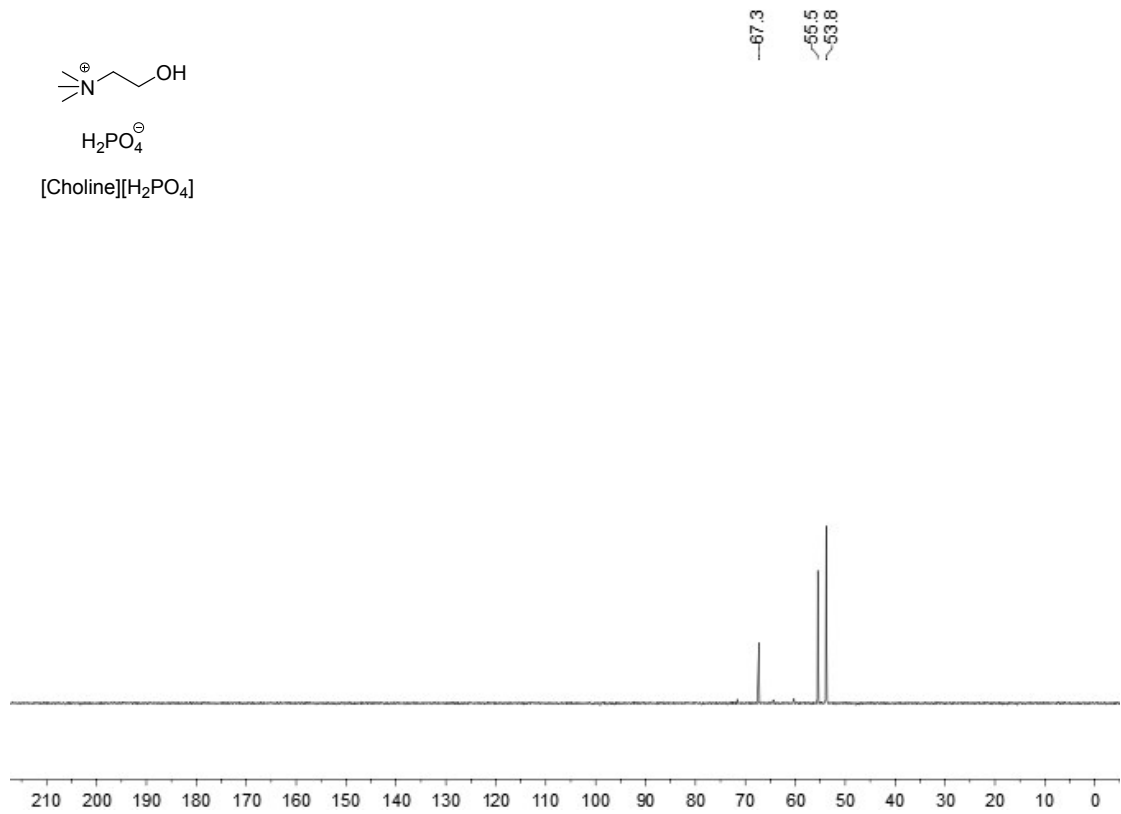

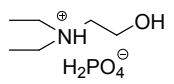

[DEEOA][H<sub>2</sub>PO<sub>4</sub>]

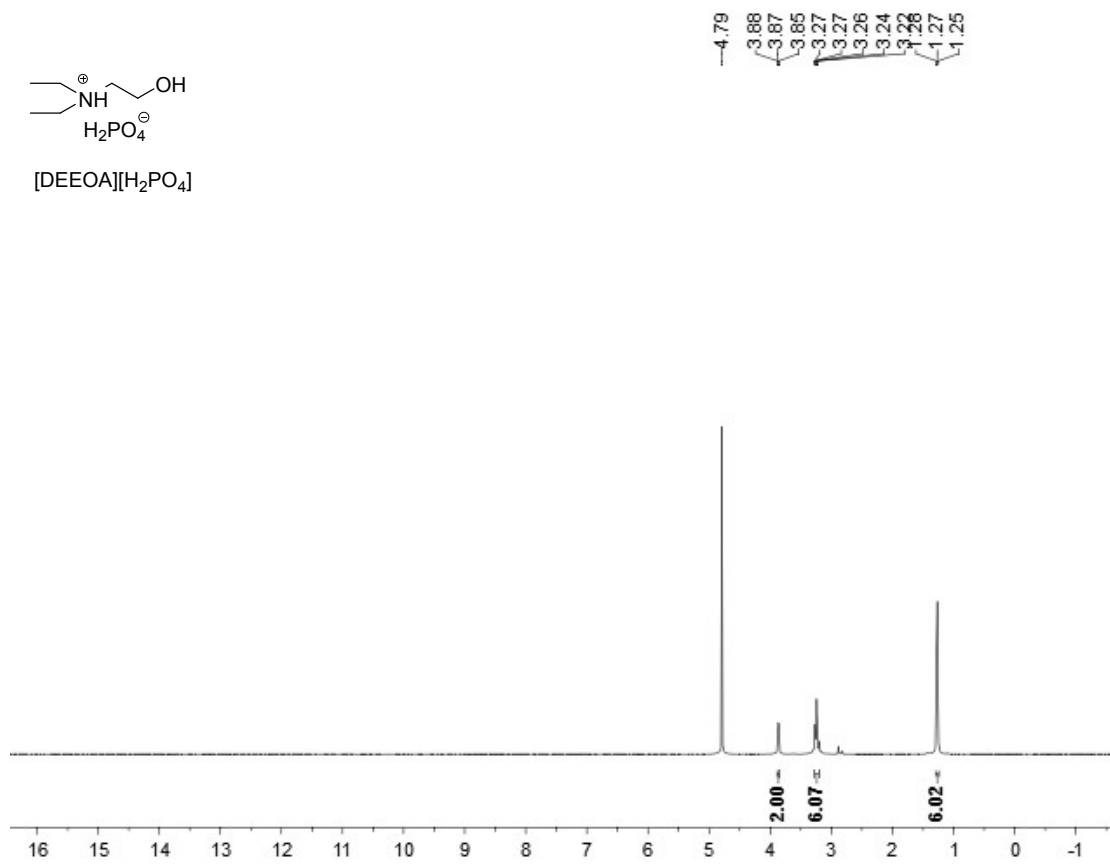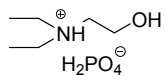

[DEEOA][H<sub>2</sub>PO<sub>4</sub>]

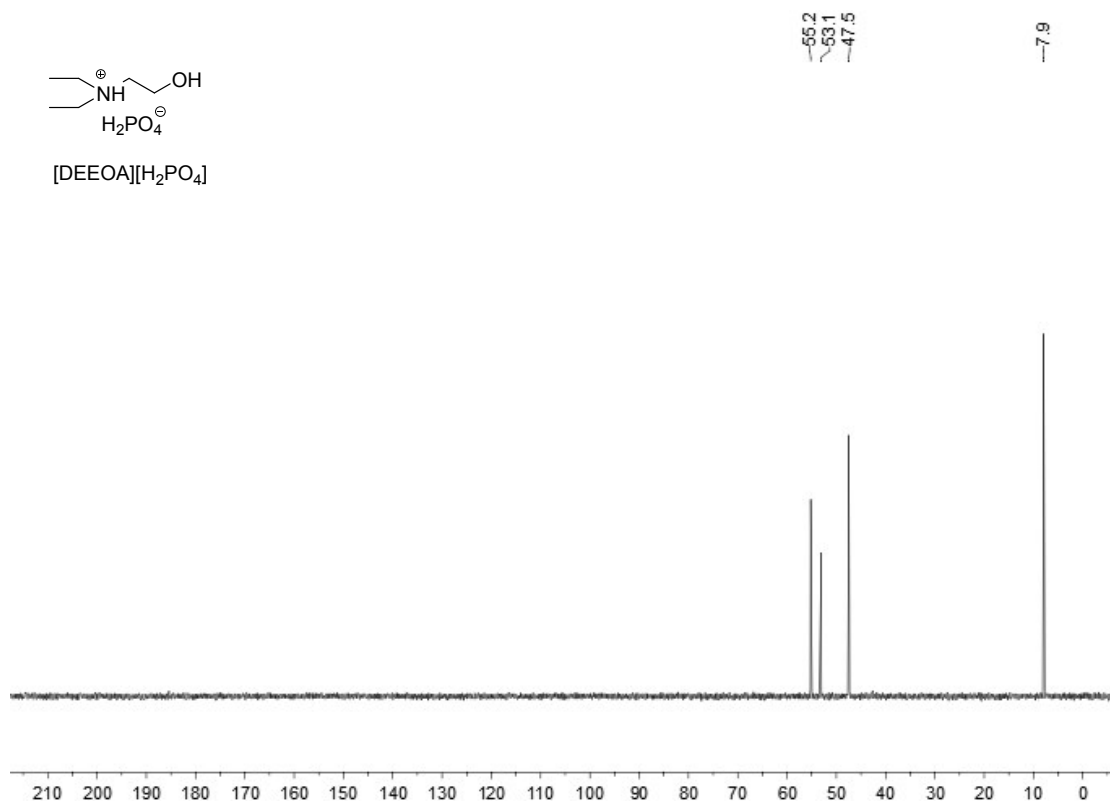

[Betaine][H<sub>2</sub>PO<sub>4</sub>]

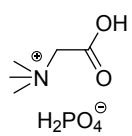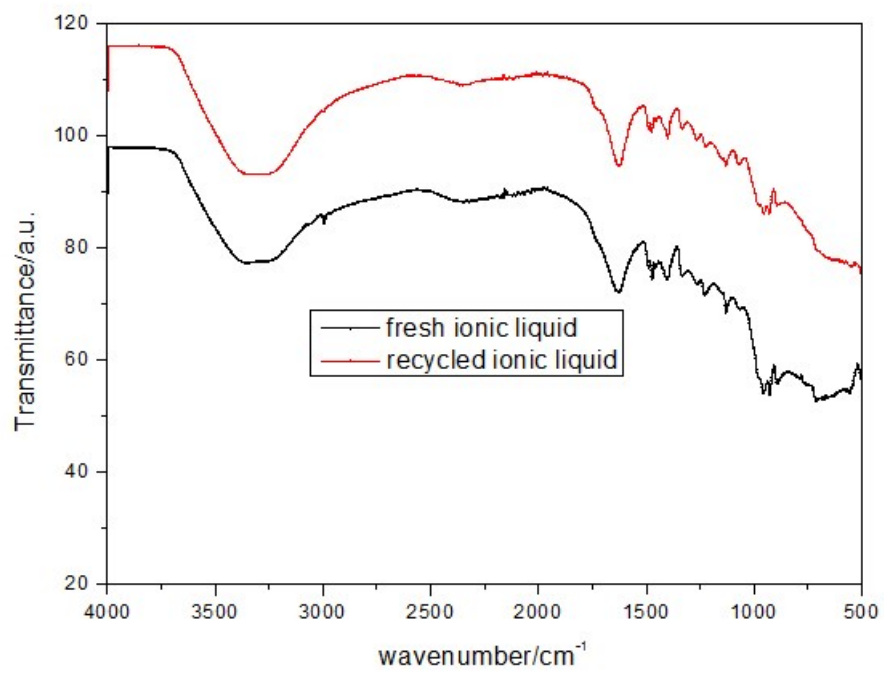

Supplement: d0ra05374k1.pdf [file d0ra05374k1.pdf]
